# Supplementary material
Source: bioRxiv or medRxiv preprint supplement (https://www.biorxiv.org/highwire/filestream/73431/field_highwire_adjunct_files/7/180620-2.pdf)

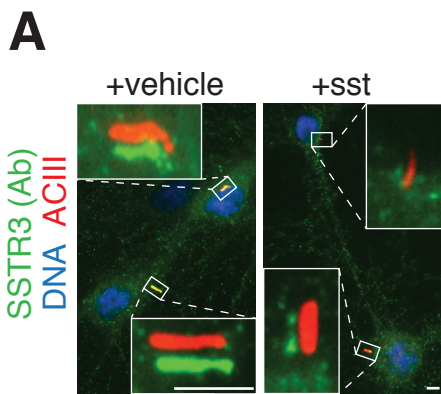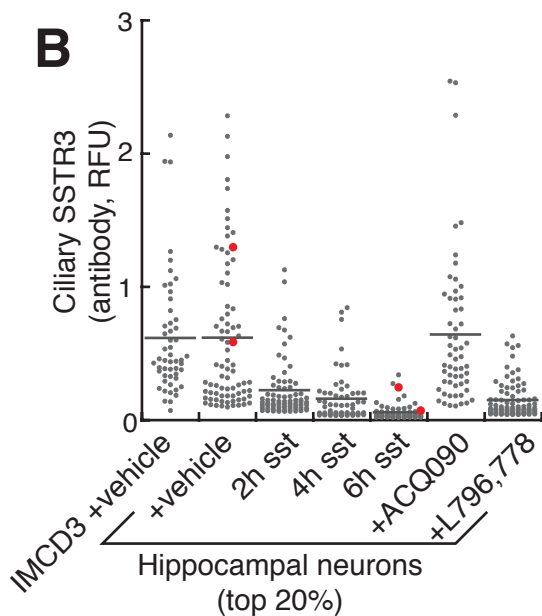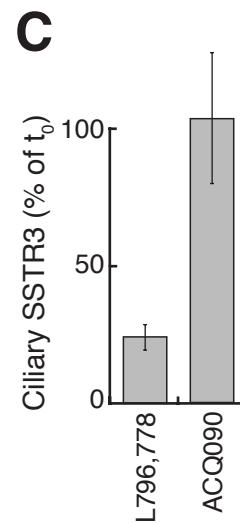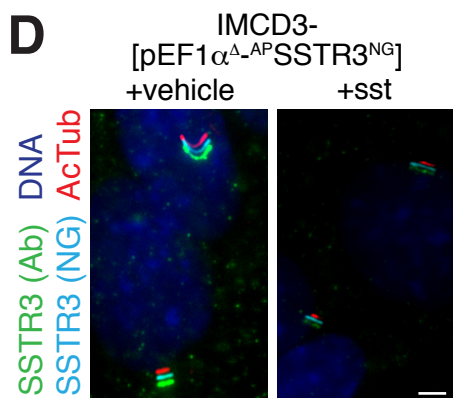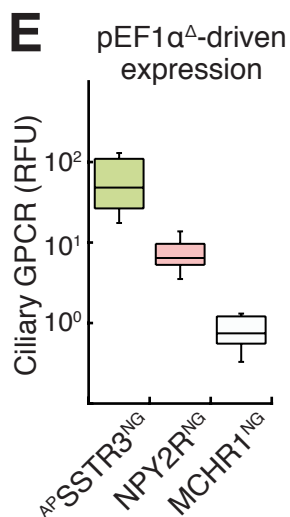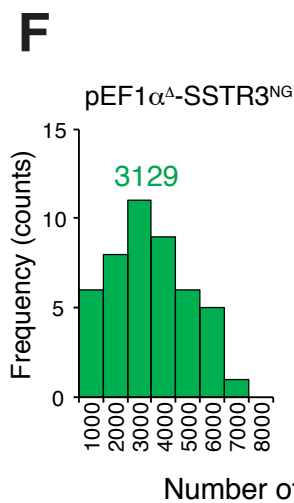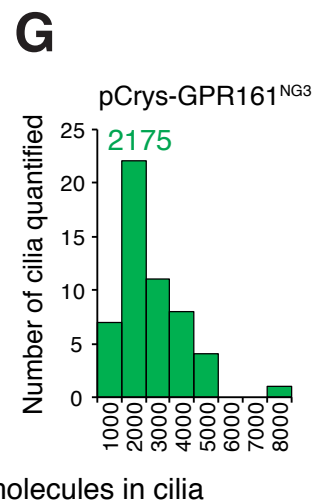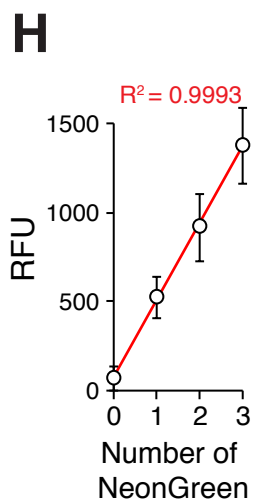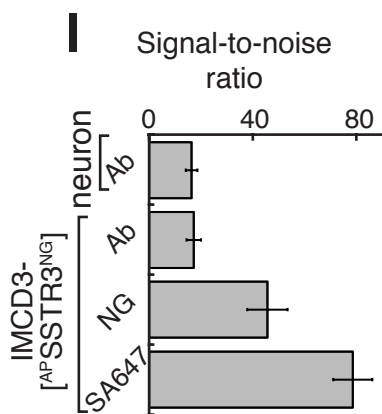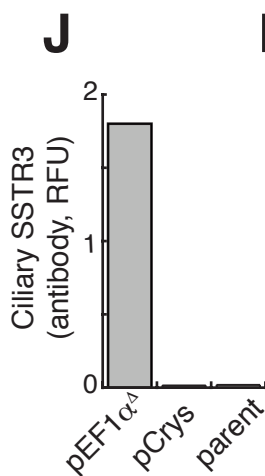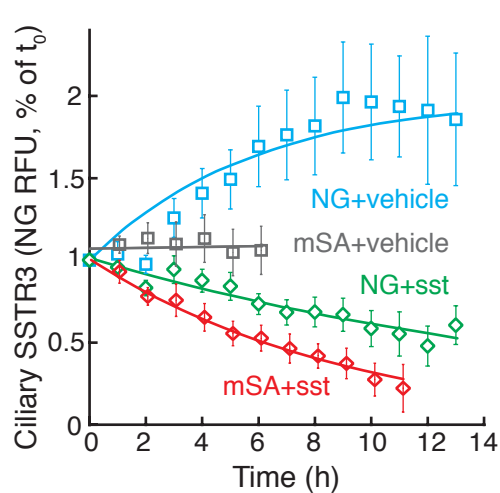

Supplement: Supplementary file [file 180620-2.pdf]
